# Supplementary material
Source: Springer Nature journal article supplement (https://www.springermedizin.de/resource/supplementary/12936_2008_707_MOESM2_ESM.pdf/9548050)
Supplement: MOESM2 [file 9548050]

**Suspected malaria**  
240

**Slide requested**  
239

**Clinic slide +**  
**37.2% (89/239)**  
RDT+ 2.2%  
(2/89)

**Clinic slide -**  
**62.8% (150/239)**  
RDT+ 4.0%  
(6/150)

**Malaria treatment**  
**100.0%**  
**(89/89)**

**No malaria treatment**  
**0.0% (0/0)**

**Malaria treatment**  
**58.7%**  
**(88/150)**

**No malaria treatment**  
**41.3%**  
**(62/150)**

Research slide +  
1.1% (1/89)  
RDT+  
2.2% (2/89)

Research slide +  
0.0% (0/0)  
RDT+  
0.0% (0/0)

Research slide +  
0.0% (0/88)  
RDT+  
3.4% (3/88)

Research slide +  
1.7% (1/62)  
RDT+  
4.8% (3/62)
